# Supplementary material for: Forays into rhodium macrocyclic chemistry stabilized by a P2N2 donor set. Activation of dihydrogen and benzene
Source: Royal Society of Chemistry journal article supplement (doi:10.1039/d0dt03688a), 2020-12-10
Supplement: d0dt03688a1.pdf [file d0dt03688a1.pdf]

## Electronic Supporting Information

# Forays into Rhodium Macrocyclic Chemistry Stabilized by a $P_2N_2$ Donor Set. Activation of Dihydrogen and Benzene

Alyssa Yeo, Corey A. Sanz, and Michael D. Fryzuk\*

Department of Chemistry, The University of British Columbia, 2036 Main Mall, Vancouver, BC, V6T 1Z1  
CANADA.

- Figure S1**  $^{31}P\{^1H\}$  NMR (161.9 MHz) spectrum (inset) and  $^1H\{^{31}P\}$  NMR (400 MHz) spectrum of  $[P_2N_2][Rh(COD)]_2$  (**1**) (in  $C_6D_6$ ). S2
- Figure S2** Comparison of the  $^{31}P\{^1H\}$  NMR spectra (161.9 MHz,  $C_6D_6$ ) of the material isolated after the treatment of  $[P_2N_2][Rh(COD)]_2$  (**1**) with  $H_2$  gas, before heating (top) and after heating at 80 °C for 12 h (bottom). S2
- Figure S3**  $^1H\{^{31}P\}$  NMR spectrum (400 MHz,  $C_6D_6$ ) of the material isolated after the treatment of  $[P_2N_2][Rh(COD)]_2$  (**1**) with  $H_2$  gas, after heating at 80 °C for 12 h. S3
- Figure S4**  $^{31}P\{^1H\}$  NMR (161.9 MHz) spectrum (inset) and  $^1H\{^{31}P\}$  NMR (400 MHz) spectrum of  $([Rh(COE)][P_2N_2]Li)_2$ (dioxane) (**2**) (in  $C_6D_6$ ). S3
- Figure S5**  $^{31}P\{^1H\}$  NMR (161.9 MHz) spectrum (inset) and  $^1H$  NMR (400 MHz) spectrum of  $Rh[P_2N_2H](H)_2$  (**3**) (in  $C_6D_6$ ). (Resonances denoted with \*) indicate residual solvent impurities of hexanes and HMDSO). S4
- Figure S6**  $^{13}C$  APT NMR spectrum (100.6 MHz,  $C_6D_6$ ) of  $Rh[P_2N_2H](H)_2$  (**3**) (with methine and methyl carbons in a positive phase and negatively phased quaternary carbons and methylene carbons). (Resonance denoted with \*) corresponds to residual HMDSO). S4
- Figure S7**  $^1H$ - $^{13}C$  HMBC NMR spectrum (400 MHz  $^1H$  and 100.6 MHz  $^{13}C$  external projections,  $C_6D_6$ ) of  $Rh[P_2N_2H](H)_2$  (**3**) displaying a multiple-bond correlation between the N-H proton and silyl methyl carbons. S5
- Figure S8**  $^1H$  NMR (400 MHz) spectrum of  $([Rh(H)_2][P_2N_2]Li)_2$ (dioxane) (**4**) (in  $C_6D_6$ ). (Resonances denoted with \*) correspond to residual hexanes). S6
- Figure S9**  $^{31}P\{^1H\}$  NMR (161.9 MHz) spectrum of  $([Rh(H)_2][P_2N_2]Li)_2$ (dioxane) (**4**) (in  $C_6D_6$ ). S6
- Figure S10**  $^{13}C\{^1H\}$  NMR (100.6 MHz) spectrum of  $([Rh(H)_2][P_2N_2]Li)_2$ (dioxane) (**4**) (in  $C_6D_6$ ). (Resonances denoted with \*) correspond to residual hexanes). S7
- Figure S11**  $^1H$  NMR (400 MHz) spectrum of  $([Rh(C_6H_5)H][P_2N_2]Li)_2$ (dioxane) (**5**) (in  $C_6D_6$ ). (Resonances denoted with \*) correspond to residual hexanes). S7
- Figure S12**  $^{31}P\{^1H\}$  NMR (161.9 MHz) spectrum of  $([Rh(C_6H_5)H][P_2N_2]Li)_2$ (dioxane) (**5**) (in  $C_6D_6$ ). S8
- Figure S13**  $^{13}C\{^1H\}$  NMR (100.6 MHz) spectrum of  $([Rh(C_6H_5)H][P_2N_2]Li)_2$ (dioxane) (**5**) (in  $C_6D_6$ ). (Resonances denoted with \*) correspond to residual hexanes). S8
- Figure S13**  $^{13}C\{^1H\}$  NMR (100.6 MHz) spectrum of  $([Rh(C_6H_5)H][P_2N_2]Li)_2$ (dioxane) (**5**) (in  $C_6D_6$ ). (Resonances denoted with \*) correspond to residual hexanes). S8
- Figure S14**  $^1H$  NMR (400 MHz) spectrum of  $Rh[P_2N_2H](COE)$  (**6**) (in  $C_6D_6$ ). S9
- Figure S15**  $^{31}P\{^1H\}$  NMR (161.9 MHz) spectrum of  $Rh[P_2N_2H](COE)$  (**6**) (in  $C_6D_6$ ) at 298K. S9
- Figure S16**  $^{31}P\{^1H\}$  NMR (161.9 MHz) spectrum of  $Rh[P_2N_2H](COE)$  (**6**) (in toluene- $d_8$ ) at 188K. S10
- Figure S17**  $^{13}C\{^1H\}$  NMR (100.6 MHz) spectrum of  $Rh[P_2N_2H](COE)$  (**6**) (in  $C_6D_6$ ). S10
- Figure S18** DEPT-135 /  $^{13}C\{^1H\}$  NMR (100.6 MHz) spectrum of  $Rh[P_2N_2H](COE)$  (**6**) (in  $C_6D_6$ ). +/-x refers to up/down/missing in DEPT-135 spectrum. S11
- Figure S19**  $^1H$  NMR (400 MHz) spectrum of the reaction between  $Rh[P_2N_2H](COE)$  (**6**) and  $H_2$  (in  $C_6D_6$ ). (Resonance denoted with \*) corresponds to cyclooctane formed in the reaction). S11
- Figure S20**  $^{31}P\{^1H\}$  NMR (161.9 MHz) spectrum of the reaction of  $Rh[P_2N_2H](COE)$  (**6**) with  $H_2$  ( $C_6D_6$ ). S12
- Figure S21**  $^1H$  NMR (400 MHz) spectrum of the in-situ sample taken from the reaction of  $([Rh(COE)][P_2N_2]Li)_2$ (dioxane) (**2**) with  $H_2$  after 4 days (1:1  $C_6H_6:C_6D_6$ ; the aromatic region of spectrum was distorted due to the very large  $C_6H_6$  signal and so it is not shown). (Resonance denoted with \*) corresponds to cyclooctane formed in the reaction). S12
- Figure S22**  $^{31}P\{^1H\}$  NMR (161.9 MHz) spectrum of the in-situ sample taken from the reaction of  $([Rh(COE)][P_2N_2]Li)_2$ (dioxane) (**2**) with  $H_2$  after 4 days (1:1  $C_6H_6:C_6D_6$ ). S13
- X-ray Crystallographic Analyses, CDCC's and Tables S1-S4** for  $[P_2N_2][Rh(COD)]_2$ ,  $([Rh(COE)][P_2N_2]Li)_2$ (dioxane),  $Rh[P_2N_2H](H)_2$ ,  $([Rh(C_6H_5)H][P_2N_2]Li)_2$ (dioxane),  $([Rh(H)_2][P_2N_2]Li)_2$ (dioxane), and  $Rh[P_2N_2H](COE)$  S14-S18
- References** S19

## Selected NMR Spectra

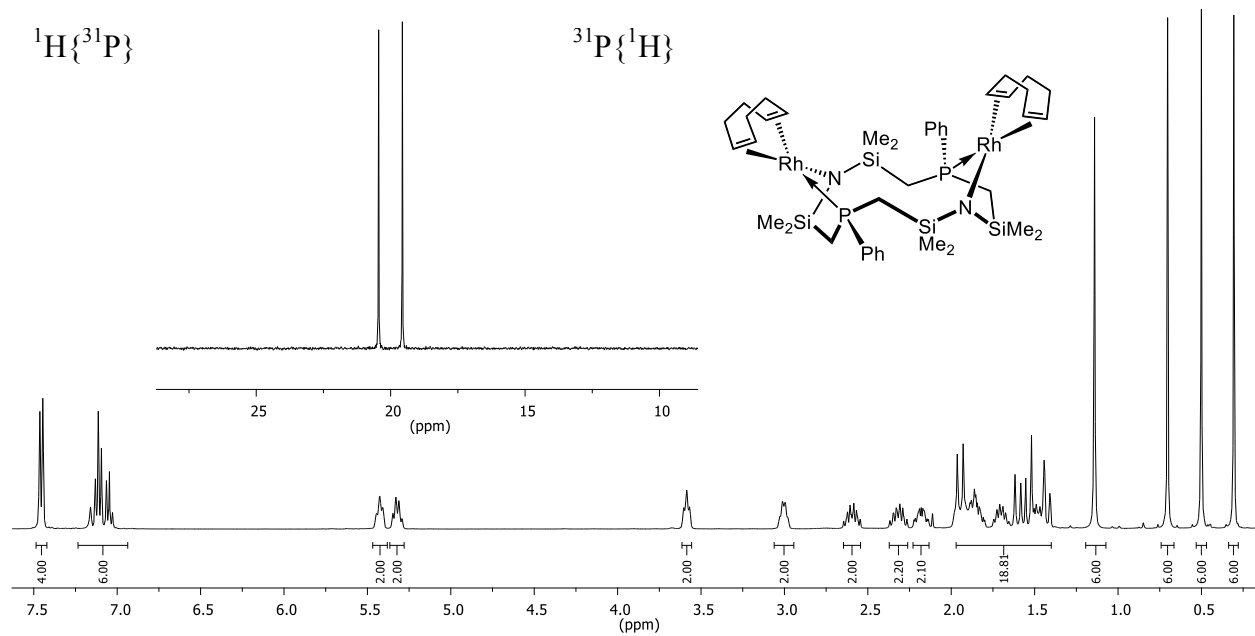

**Figure S1**  $^{31}\text{P}\{^1\text{H}\}$  NMR (161.9 MHz) spectrum (inset) and  $^1\text{H}\{^{31}\text{P}\}$  NMR (400 MHz) spectrum of  $[\text{P}_2\text{N}_2][\text{Rh}(\text{COD})]_2$  (**1**) (in  $\text{C}_6\text{D}_6$ ).

$^{31}\text{P}$  NMR (161.9 MHz,  $\text{C}_6\text{D}_6$ )  $\delta$  33.65 (d,  $J = 95.9$  Hz), 21.03 (d,  $J = 104.8$  Hz), 20.60 (d,  $J = 114.3$  Hz).

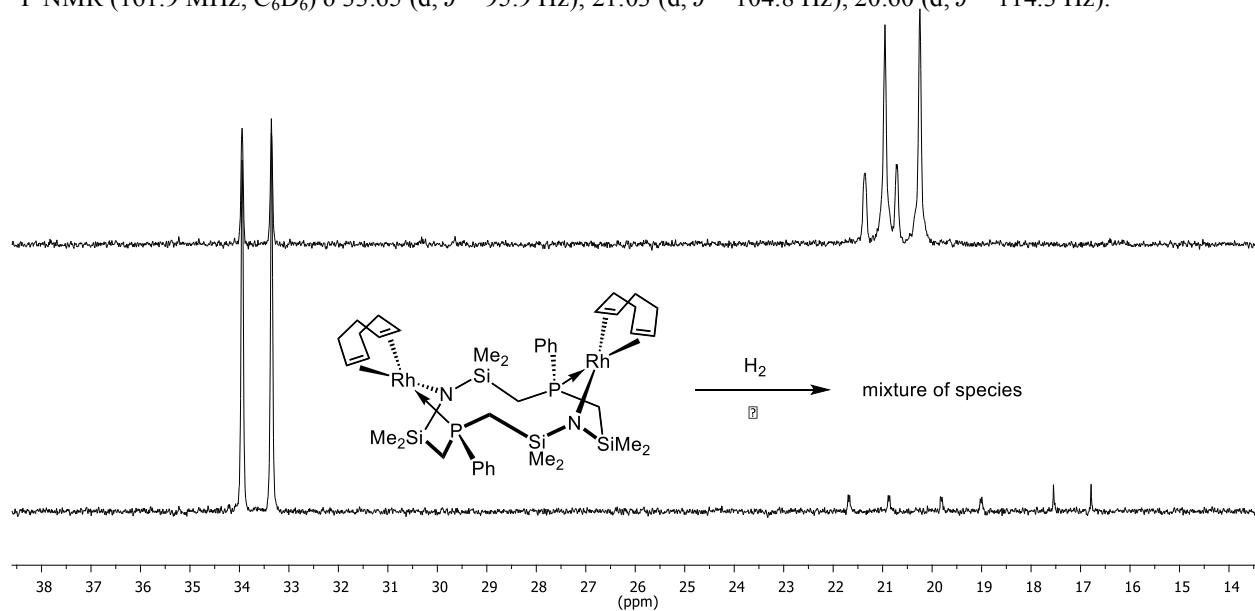



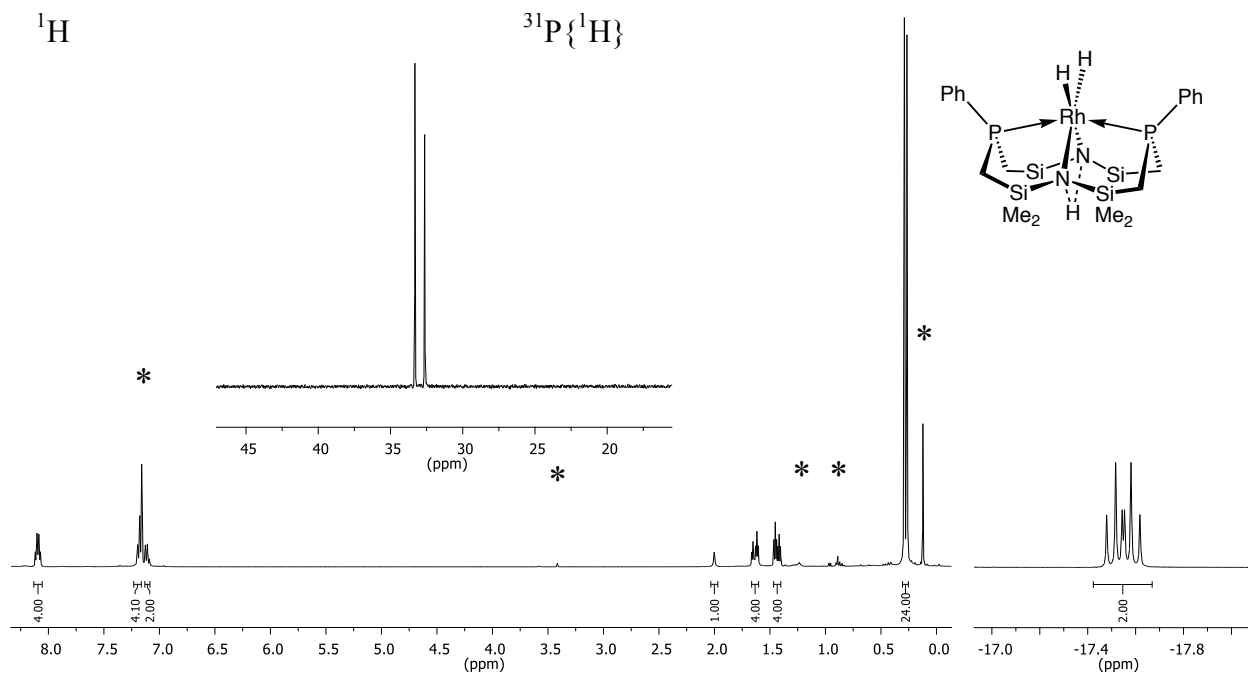

**Figure S5**  $^{31}\text{P}\{^1\text{H}\}$  NMR (161.9 MHz) spectrum (inset) and  $^1\text{H}$  NMR (400 MHz) spectrum of  $\text{Rh}[\text{P}_2\text{N}_2\text{H}](\text{H})_2$  (**3**) (in  $\text{C}_6\text{D}_6$ ). (Resonances denoted with (\*) indicate residual solvent impurities of hexanes and HMDSO).

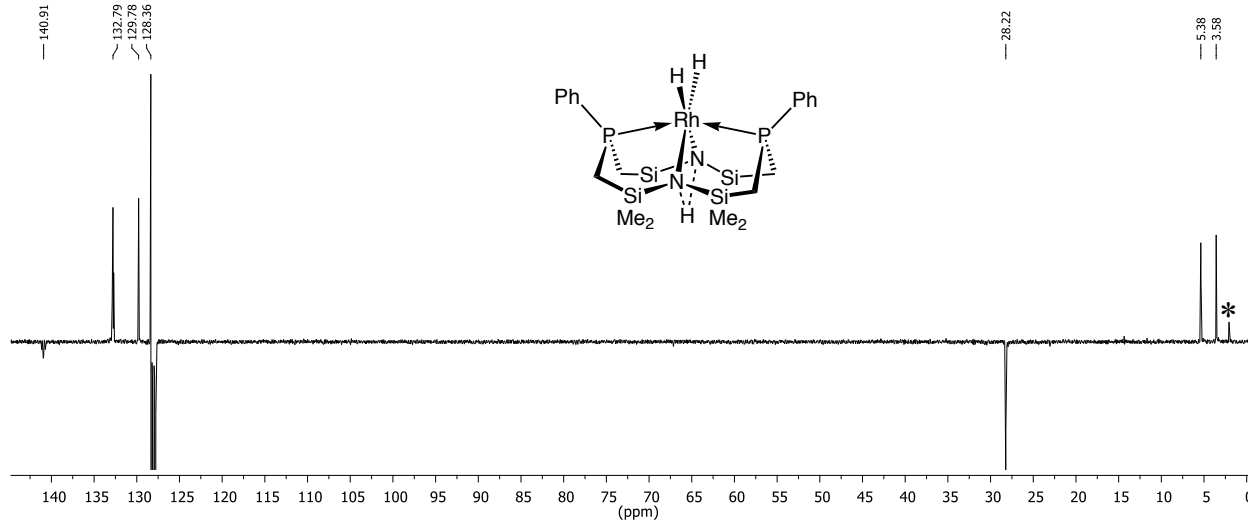

**Figure S6**  $^{13}\text{C}$  APT NMR spectrum (100.6 MHz,  $\text{C}_6\text{D}_6$ ) of  $\text{Rh}[\text{P}_2\text{N}_2\text{H}](\text{H})_2$  (**3**) (with methine and methyl carbons in a positive phase and negatively phased quaternary carbons and methylene carbons). (Resonance denoted with (\*) corresponds to residual HMDSO).

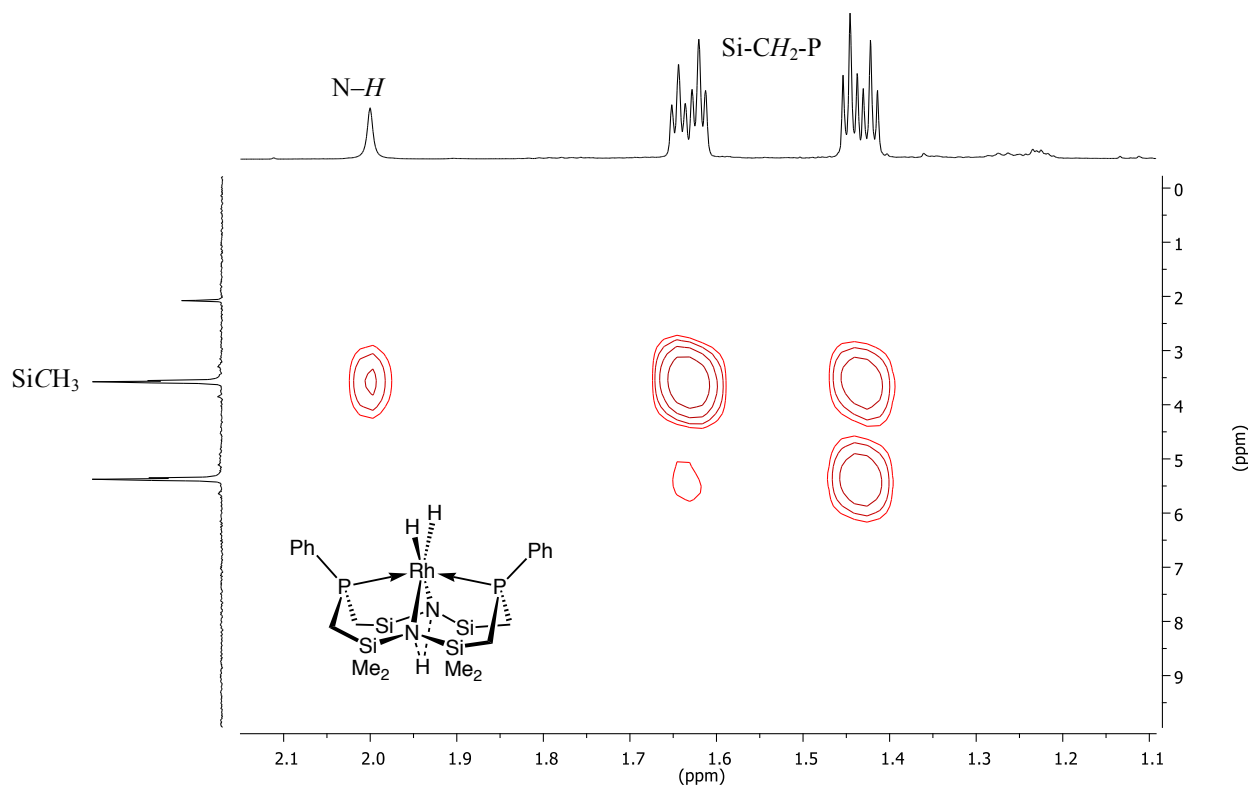

**Figure S7**  $^1\text{H}$ - $^{13}\text{C}$  HMBC NMR spectrum (400 MHz  $^1\text{H}$  and 100.6 MHz  $^{13}\text{C}$  external projections,  $\text{C}_6\text{D}_6$ ) of  $\text{Rh}[\text{P}_2\text{N}_2\text{H}](\text{H})_2$  (**3**) displaying a multiple-bond correlation between the N-H proton and silyl methyl carbons.

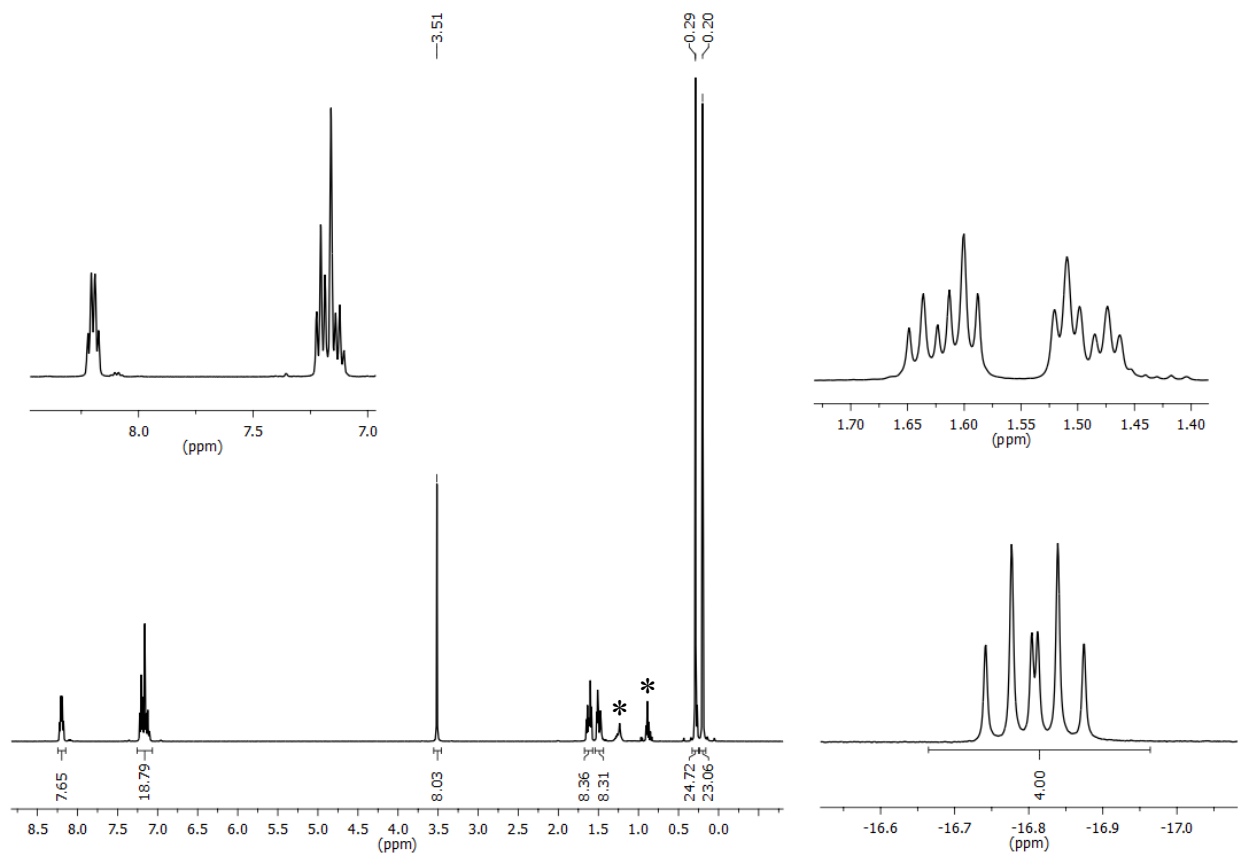

**Figure S8**  $^1\text{H}$  NMR (400 MHz) spectrum of  $([\text{Rh}(\text{H})_2][\text{P}_2\text{N}_2]\text{Li})_2(\text{dioxane})$  (**4**) (in  $\text{C}_6\text{D}_6$ ). (Resonances denoted with (\*) correspond to residual hexanes).

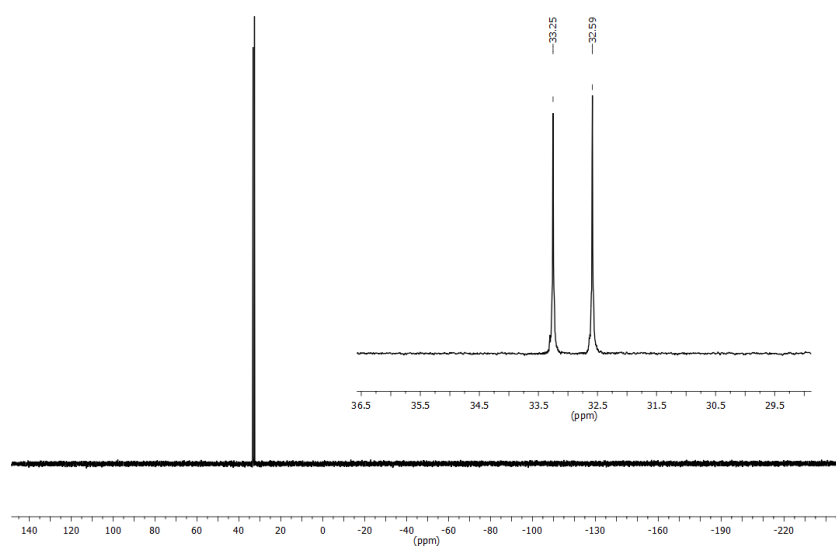

**Figure S9**  $^{31}\text{P}\{^1\text{H}\}$  NMR (161.9 MHz) spectrum of  $([\text{Rh}(\text{H})_2][\text{P}_2\text{N}_2]\text{Li})_2(\text{dioxane})$  (**4**) (in  $\text{C}_6\text{D}_6$ ).



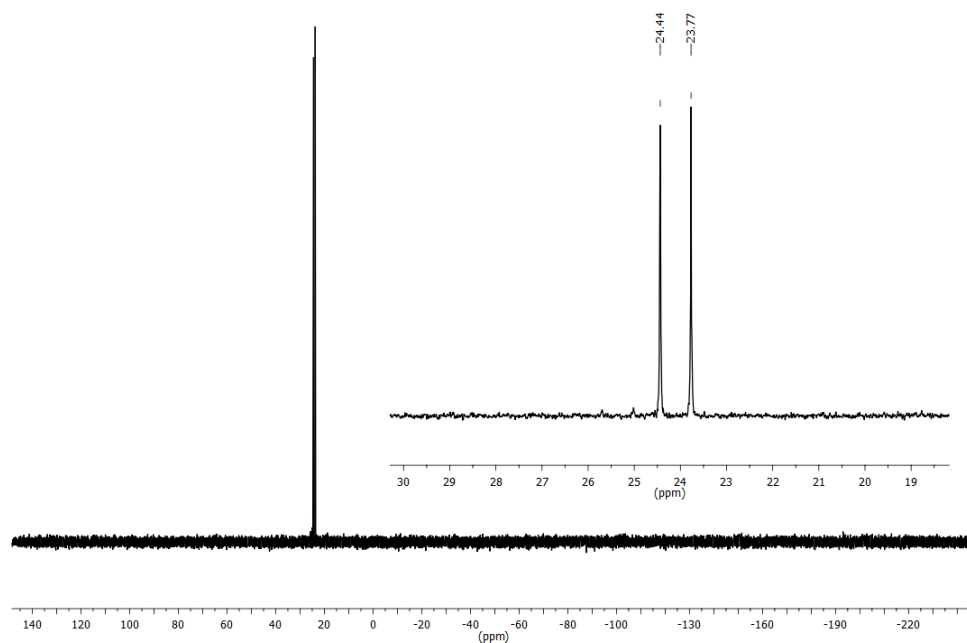

**Figure S12**  $^{31}\text{P}\{^1\text{H}\}$  NMR (161.9 MHz) spectrum of  $[(\text{Rh}(\text{C}_6\text{H}_5)\text{H})[\text{P}_2\text{N}_2]\text{Li}]_2(\text{dioxane})$  (**5**) (in  $\text{C}_6\text{D}_6$ ).

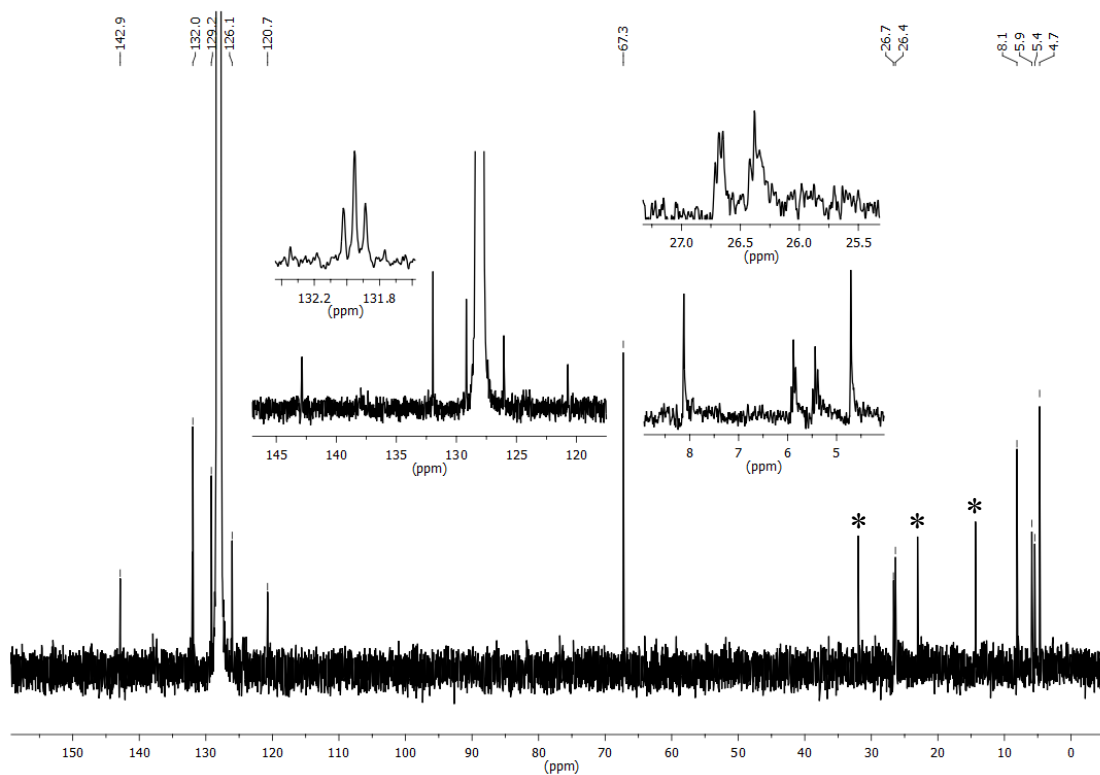

**Figure S13**  $^{13}\text{C}\{^1\text{H}\}$  NMR (100.6 MHz) spectrum of  $[(\text{Rh}(\text{C}_6\text{H}_5)\text{H})[\text{P}_2\text{N}_2]\text{Li}]_2(\text{dioxane})$  (**5**) (in  $\text{C}_6\text{D}_6$ ). (Resonances denoted with  $*$ ) correspond to residual hexanes).



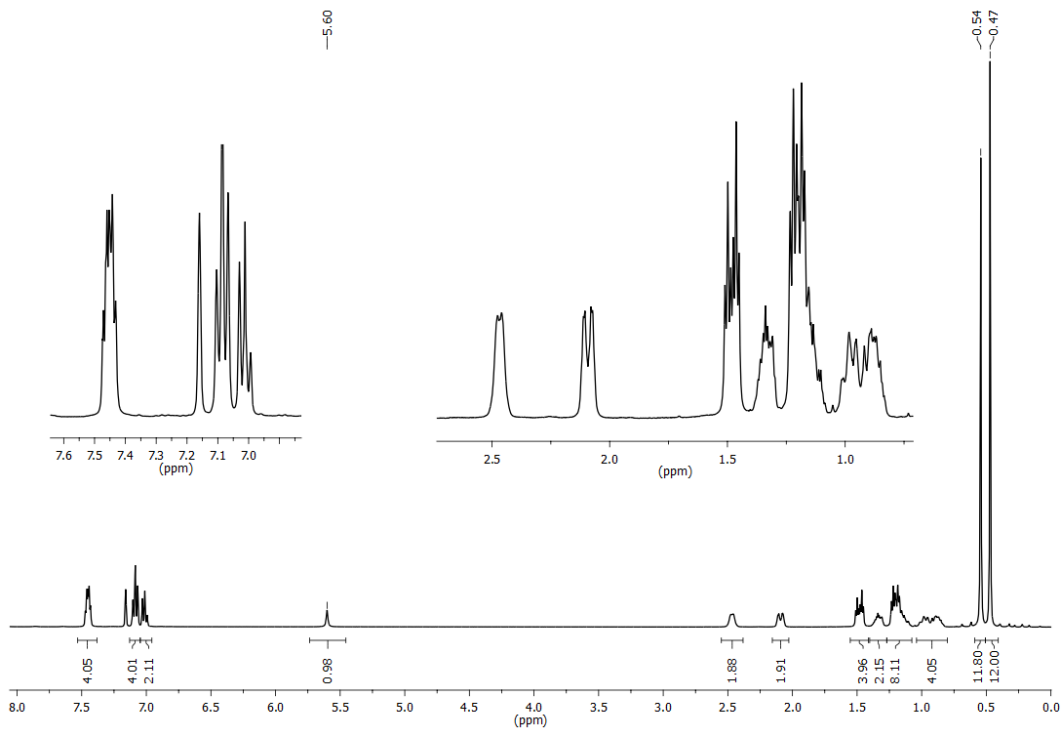

**Figure S14**  $^1\text{H}$  NMR (400 MHz) spectrum of  $\text{Rh}[\text{P}_2\text{N}_2\text{H}](\text{COE})$  (**6**) (in  $\text{C}_6\text{D}_6$ ).

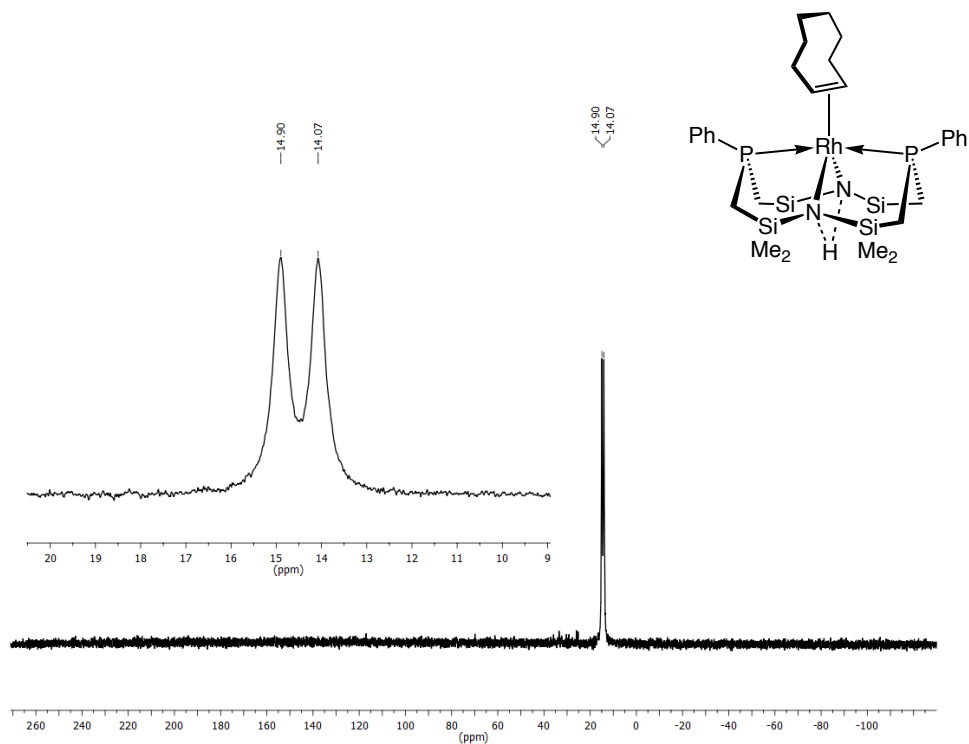

**Figure S15**  $^{31}\text{P}\{^1\text{H}\}$  NMR (161.9 MHz) spectrum of  $\text{Rh}[\text{P}_2\text{N}_2\text{H}](\text{COE})$  (**6**) (in  $\text{C}_6\text{D}_6$ ) at 298 K.

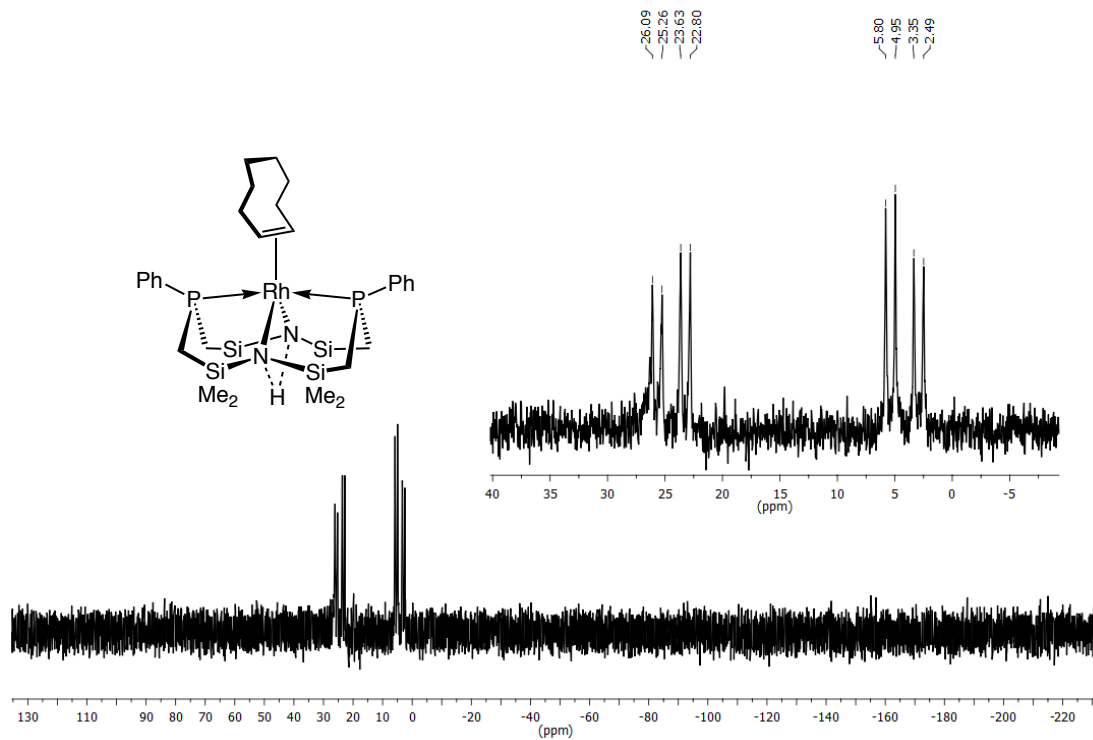

**Figure S16**  $^{31}\text{P}\{^1\text{H}\}$  NMR (161.9 MHz) spectrum of  $\text{Rh}[\text{P}_2\text{N}_2\text{H}](\text{COE})$  (6) (in  $\text{toluene-d}_8$ ) at 188K.

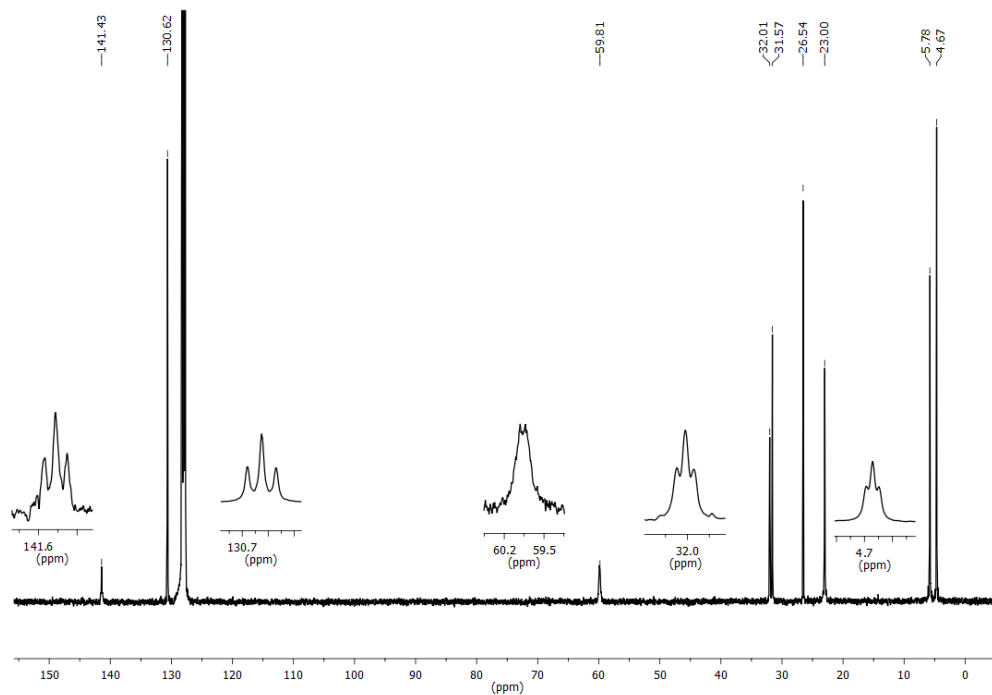

**Figure S17**  $^{13}\text{C}\{^1\text{H}\}$  NMR (100.6 MHz) spectrum of  $\text{Rh}[\text{P}_2\text{N}_2\text{H}](\text{COE})$  (6) (in  $\text{C}_6\text{D}_6$ ).

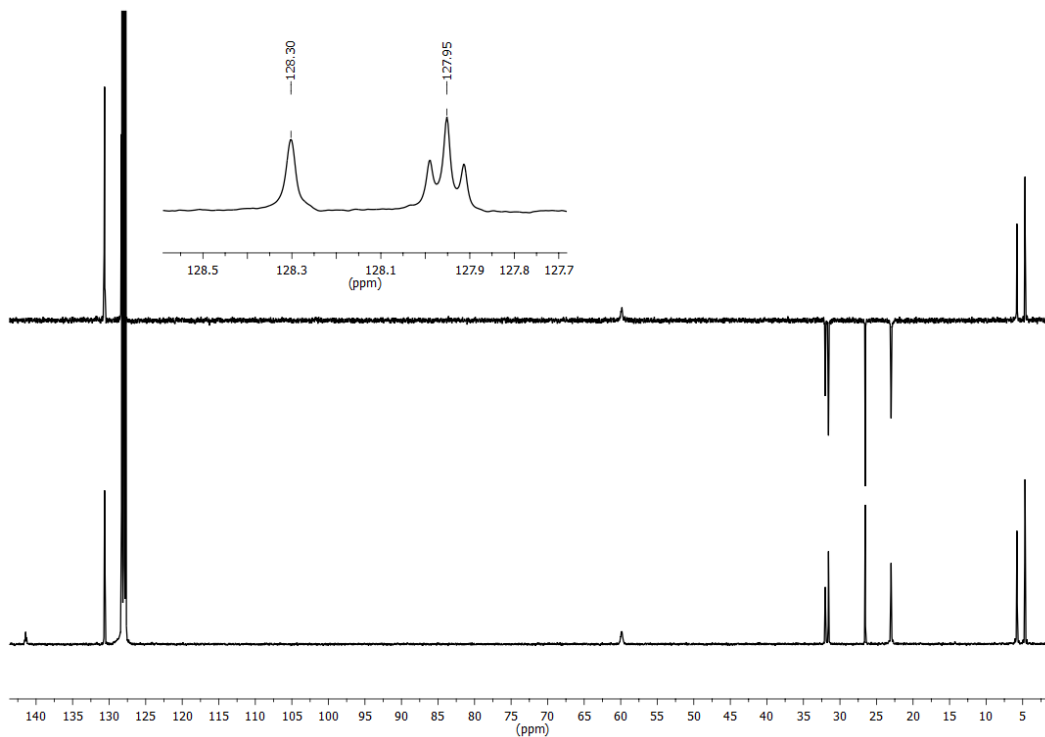

**Figure S18** DEPT-135 /  $^{13}\text{C}\{^1\text{H}\}$  NMR (100.6 MHz) spectrum of  $\text{Rh}[\text{P}_2\text{N}_2\text{H}](\text{COE})$  (**6**) (in  $\text{C}_6\text{D}_6$ ). +/-x refers to up/down/missing in DEPT-135 spectrum.

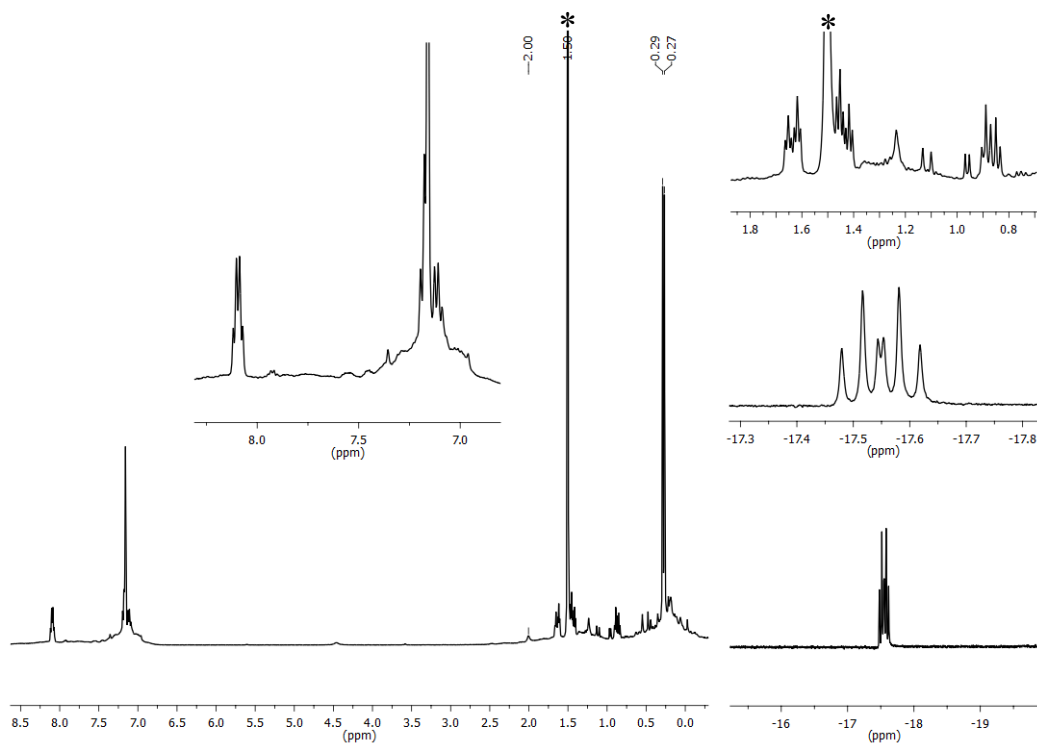

**Figure S19**  $^1\text{H}$  NMR (400 MHz) spectrum of the reaction between  $\text{Rh}[\text{P}_2\text{N}_2\text{H}](\text{COE})$  (**6**) and  $\text{H}_2$  (in  $\text{C}_6\text{D}_6$ ). (Resonance denoted with (\*)) corresponds to cyclooctane formed in the reaction).

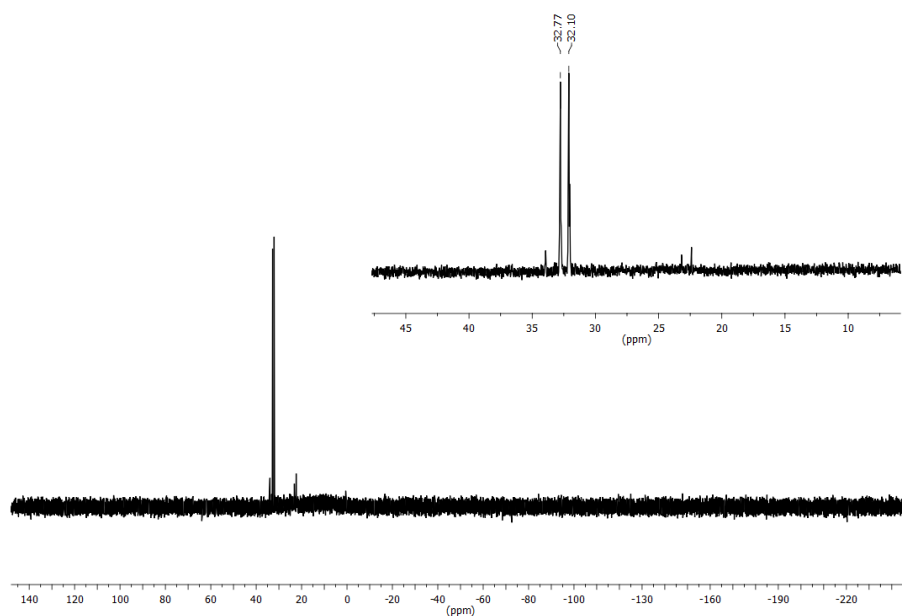

**Figure S20**  $^{31}\text{P}\{^1\text{H}\}$  NMR (161.9 MHz) spectrum of the reaction between  $\text{Rh}[\text{P}_2\text{N}_2\text{H}](\text{COE})$  (**6**) and  $\text{H}_2$  (in  $\text{C}_6\text{D}_6$ ).

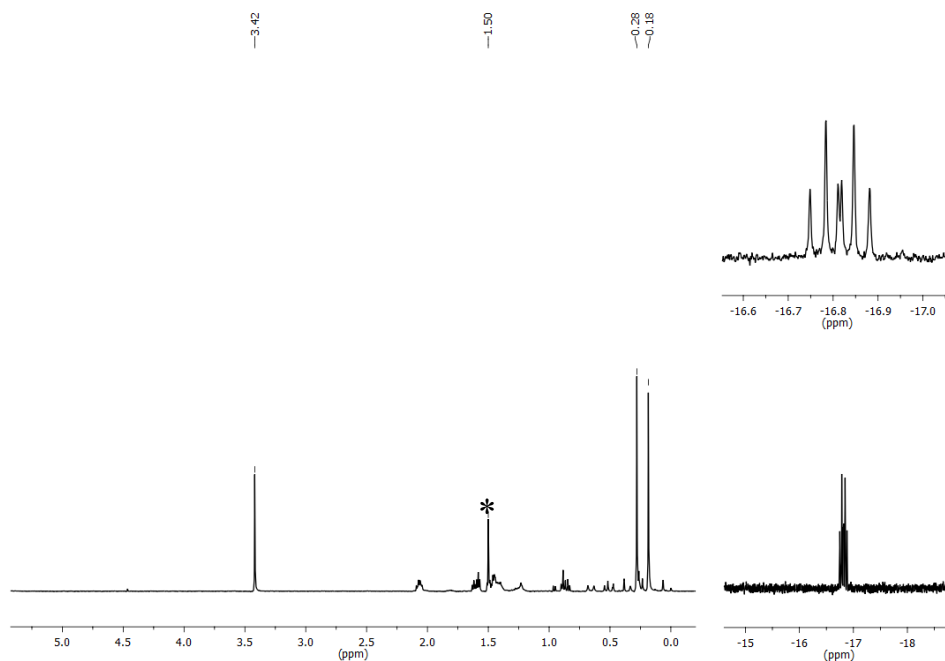

**Figure S21**  $^1\text{H}$  NMR (400 MHz) spectrum of the in-situ sample taken from the reaction of  $([\text{Rh}(\text{COE})][\text{P}_2\text{N}_2]\text{Li})_2$ (dioxane) (**2**) with  $\text{H}_2$  after 4 days (1:1  $\text{C}_6\text{H}_6$ : $\text{C}_6\text{D}_6$ ; the aromatic region of spectrum was distorted due to the very large  $\text{C}_6\text{H}_6$  signal and so it is not shown). (Resonance denoted with (\*)) corresponds to cyclooctane formed in the reaction).

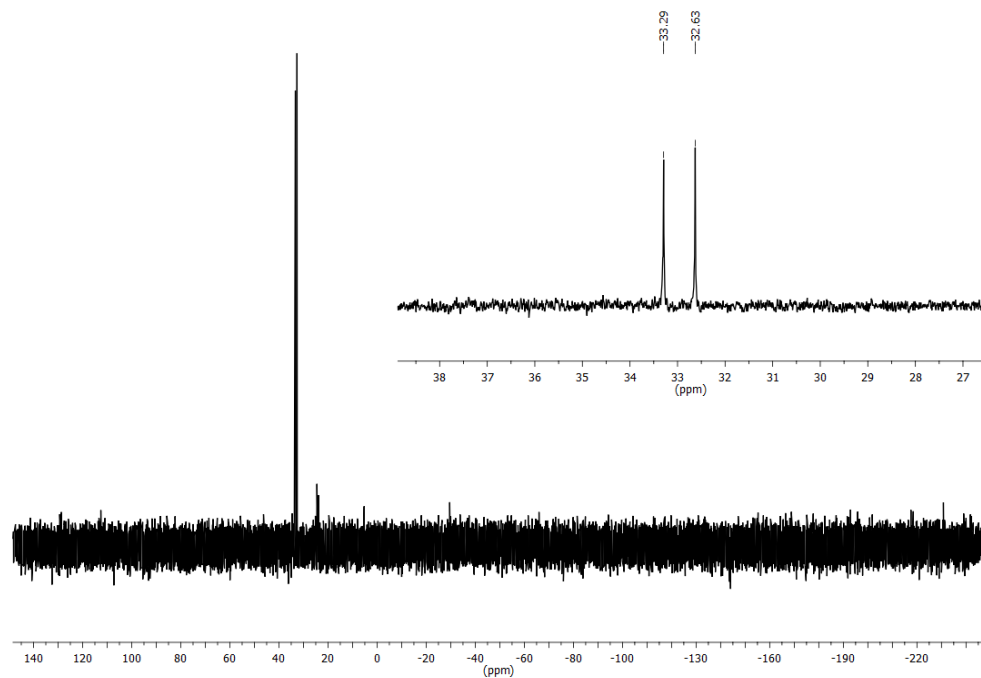

**Figure S22**  $^{31}\text{P}\{^1\text{H}\}$  NMR (161.9 MHz) spectrum of the in-situ sample taken from the reaction of  $([\text{Rh}(\text{COE})][\text{P}_2\text{N}_2]\text{Li})_2(\text{dioxane})$  (**2**) with  $\text{H}_2$  after 4 days (1:1  $\text{C}_6\text{H}_6:\text{C}_6\text{D}_6$ ).

## X-ray Crystallographic Analyses

Suitable single crystals were selected, coated in Fomblin oil and mounted on a glass loop. X-ray data was collected on a Bruker DUO or X8 Apex II diffractometer with a graphite-monochromated Mo K $\alpha$  radiation ( $\lambda = 0.71073 \text{ \AA}$ ) at a temperature of 90 or 100 K. Data was integrated using the Bruker SAINT software package.<sup>1</sup> The absorption corrections were performed using the multi-scan technique (SADABS).<sup>2</sup> The structures were solved by direct methods and refined using the Olex2<sup>3</sup> software package with the SHELX refinement program.<sup>4</sup> All non-hydrogen atoms were refined anisotropically. All hydrogen atoms (unless specified) were placed in calculated positions and assigned to an isotropic displacement parameter; the hydrogen atoms bonded to the rhodium atom in  $[\text{P}_2\text{N}_2\text{H}]\text{Rh}(\text{H})_2$  and  $([\text{RhH}(\text{Ph})][\text{P}_2\text{N}_2]\text{Li})_2$  (dioxane) were located in the difference map and were refined isotropically. ORTEPs were generated using ORTEP-3.<sup>5</sup>

## CDCC

|                                                                                                     |         |
|-----------------------------------------------------------------------------------------------------|---------|
| $[\text{P}_2\text{N}_2][\text{Rh}(\text{COD})]_2$ ( <b>1</b> )                                      | 2005434 |
| $([\text{Rh}(\text{COE})][\text{P}_2\text{N}_2]\text{Li})_2$ dioxane ( <b>2</b> )                   | 2005435 |
| $[\text{P}_2\text{N}_2\text{H}]\text{Rh}(\text{H})_2$ ( <b>3</b> )                                  | 2005436 |
| $([\text{Rh}(\text{H})_2][\text{P}_2\text{N}_2]\text{Li})_2$ dioxane ( <b>4</b> )                   | 2004254 |
| $([\text{Rh}(\text{C}_6\text{H}_5)\text{H}][\text{P}_2\text{N}_2]\text{Li})_2$ dioxane ( <b>5</b> ) | 2004255 |
| $[\text{P}_2\text{N}_2\text{H}]\text{Rh}(\text{COE})$ ( <b>6</b> )                                  | 2024716 |

**Table S1** Crystal structure and refinement data for  $[P_2N_2][Rh(COD)]_2$  (**2**)

| $[P_2N_2][Rh(COD)]_2$ ( <b>2</b> )       |                              |
|------------------------------------------|------------------------------|
| Chemical formula                         | $C_{40}H_{66}N_2P_2Rh_2Si_4$ |
| Formula weight                           | 955.06                       |
| Crystal system                           | Monoclinic                   |
| Space group                              | $P2_1/n$                     |
| a / Å                                    | 10.3474(6)                   |
| b / Å                                    | 16.4155(12)                  |
| c / Å                                    | 25.8521(18)                  |
| $\alpha$ / °                             | 90                           |
| $\beta$ / °                              | 100.362(2)                   |
| $\gamma$ / °                             | 90                           |
| Volume / Å <sup>3</sup>                  | 4319.6(5)                    |
| T / K                                    | 90(2)                        |
| Z                                        | 4                            |
| $\mu$ / mm <sup>-1</sup>                 | 0.980                        |
| $\rho$ (calcd) / g/cm <sup>3</sup>       | 1.469                        |
| F(000)                                   | 1984                         |
| Absorption correction                    | Multi-scan                   |
| Crystal size / mm                        | 0.17 x 0.09 x 0.08           |
| Wavelength / Å                           | 0.71073                      |
| Reflections collected                    | 31583                        |
| Unique reflections                       | 7645 (Rint = 0.0572)         |
| Data / restraints / parameters           | 7645 / 0 / 459               |
| Goodness-of-fit on F <sup>2</sup>        | 0.971                        |
| R indices [I > 2 $\sigma$ (I)] / R1, wR2 | 0.0333, 0.0699               |
| R indices (all data) / R1, wR2           | 0.0559, 0.0779               |
| Completeness to theta max.               | 0.998                        |
| Max. and min. transmission               | 0.9246, 0.8418               |
| Theta range for data collection / °      | 2.952 – 50.11                |

$$R1 = \frac{\sum ||F_o| - |F_c||}{\sum |F_o|}; wR2 = \left[ \frac{\sum \{w(F_o^2 - F_c^2)^2\}}{\sum w(F_o^2)^2} \right]^{1/2}$$

**Table S2** Crystal structure and refinement data for ([Rh(COE)][P<sub>2</sub>N<sub>2</sub>Li]<sub>2</sub>(dioxane) (**2**) and Rh[P<sub>2</sub>N<sub>2</sub>H](H)<sub>2</sub> (**3**)

|                                     | ([Rh(COE)][P <sub>2</sub> N <sub>2</sub> Li] <sub>2</sub> (dioxane)                                                           | Rh[P <sub>2</sub> N <sub>2</sub> H](H) <sub>2</sub>                                           |
|-------------------------------------|-------------------------------------------------------------------------------------------------------------------------------|-----------------------------------------------------------------------------------------------|
| Chemical formula                    | C <sub>68</sub> H <sub>116</sub> Li <sub>2</sub> N <sub>4</sub> O <sub>2</sub> P <sub>4</sub> Si <sub>8</sub> Rh <sub>2</sub> | C <sub>24</sub> H <sub>45</sub> N <sub>2</sub> P <sub>2</sub> Si <sub>4</sub> Rh <sub>1</sub> |
| Formula weight                      | 1594.00                                                                                                                       | 638.83                                                                                        |
| Crystal system                      | Monoclinic                                                                                                                    | Monoclinic                                                                                    |
| Space group                         | P2 <sub>1</sub> /n                                                                                                            | P2 <sub>1</sub> /c                                                                            |
| a / Å                               | 10.7614(5)                                                                                                                    | 15.1347(8)                                                                                    |
| b / Å                               | 22.3119(13)                                                                                                                   | 10.0758(5)                                                                                    |
| c / Å                               | 17.1063(8)                                                                                                                    | 20.3672(10)                                                                                   |
| α / °                               | 90                                                                                                                            | 90                                                                                            |
| β / °                               | 92.872(2)                                                                                                                     | 95.293(2)                                                                                     |
| γ / °                               | 90                                                                                                                            | 90                                                                                            |
| Volume / Å <sup>3</sup>             | 4102.2(4)                                                                                                                     | 3092.6(3)                                                                                     |
| T / K                               | 100(2)                                                                                                                        | 100(2)                                                                                        |
| Z                                   | 2                                                                                                                             | 4                                                                                             |
| μ / mm <sup>-1</sup>                | 0.639                                                                                                                         | 0.827                                                                                         |
| ρ (calcd) / g/cm <sup>3</sup>       | 1.287                                                                                                                         | 1.372                                                                                         |
| F(000)                              | 1672                                                                                                                          | 1336                                                                                          |
| Absorption correction               | Multi-scan                                                                                                                    | Multi-scan                                                                                    |
| Crystal size / mm                   | 0.27 x 0.17 x 0.17                                                                                                            | 0.48 x 0.35 x 0.28                                                                            |
| Wavelength / Å                      | 0.71073                                                                                                                       | 0.71073                                                                                       |
| Reflections collected               | 16275                                                                                                                         | 35414                                                                                         |
| Unique reflections                  | 7270 (Rint = 0.0405)                                                                                                          | 9055 (Rint = 0.0269)                                                                          |
| Data / restraints / parameters      | 7270 / 30 / 496                                                                                                               | 9055 / 0 / 318                                                                                |
| Goodness-of-fit on F <sup>2</sup>   | 1.052                                                                                                                         | 1.134                                                                                         |
| R indices [I > 2σ(I)] / R1, wR2     | 0.0498, 0.1230                                                                                                                | 0.0231, 0.0649                                                                                |
| R indices (all data) / R1, wR2      | 0.0761, 0.1368                                                                                                                | 0.0268, 0.0667                                                                                |
| Completeness to theta max.          | 0.972                                                                                                                         | 0.999                                                                                         |
| Max. and min. transmission          | 0.8971, 0.6689                                                                                                                | 0.7933, 0.7095                                                                                |
| Theta range for data collection / ° | 3.65 – 50.628                                                                                                                 | 2.702 – 60.09                                                                                 |

$$R1 = \frac{\sum ||F_o| - |F_c||}{\sum |F_o|}; wR2 = \left[ \frac{\sum \{w(F_o^2 - F_c^2)^2\}}{\sum w(F_o^2)^2} \right]^{1/2}$$



**Table S3** Crystal structure and refinement data for ([Rh(C<sub>6</sub>H<sub>5</sub>)H][P<sub>2</sub>N<sub>2</sub>Li]<sub>2</sub>(dioxane) (**5**) and ([Rh(H)<sub>2</sub>][P<sub>2</sub>N<sub>2</sub>Li]<sub>2</sub>(dioxane) (**4**)

|                                             | ([Rh(C <sub>6</sub> H <sub>5</sub> )H][P <sub>2</sub> N <sub>2</sub> Li] <sub>2</sub> (dioxane)                               | ([Rh(H) <sub>2</sub> ][P <sub>2</sub> N <sub>2</sub> Li] <sub>2</sub> (dioxane)                                               |
|---------------------------------------------|-------------------------------------------------------------------------------------------------------------------------------|-------------------------------------------------------------------------------------------------------------------------------|
| Chemical formula                            | C <sub>88</sub> H <sub>128</sub> Li <sub>2</sub> N <sub>4</sub> O <sub>2</sub> P <sub>4</sub> Rh <sub>2</sub> Si <sub>8</sub> | C <sub>68</sub> H <sub>120</sub> Li <sub>2</sub> N <sub>4</sub> O <sub>2</sub> Si <sub>8</sub> P <sub>4</sub> Rh <sub>2</sub> |
| Formula weight                              | 1842.24                                                                                                                       | 1593.97                                                                                                                       |
| Temperature/K                               | 90                                                                                                                            | 90                                                                                                                            |
| Crystal system                              | triclinic                                                                                                                     | triclinic                                                                                                                     |
| Space group                                 | P-1                                                                                                                           | P-1                                                                                                                           |
| a/Å                                         | 11.3155(12)                                                                                                                   | 13.1434(14)                                                                                                                   |
| b/Å                                         | 12.3073(13)                                                                                                                   | 15.766(2)                                                                                                                     |
| c/Å                                         | 17.4753(18)                                                                                                                   | 19.777(2)                                                                                                                     |
| α/°                                         | 95.810(7)                                                                                                                     | 101.806(7)                                                                                                                    |
| β/°                                         | 94.411(7)                                                                                                                     | 108.701(5)                                                                                                                    |
| γ/°                                         | 103.071(6)                                                                                                                    | 90.185(7)                                                                                                                     |
| Volume/Å <sup>3</sup>                       | 2345.9(4)                                                                                                                     | 3789.4(8)                                                                                                                     |
| Z                                           | 1                                                                                                                             | 2                                                                                                                             |
| ρ <sub>calc</sub> /cm <sup>3</sup>          | 1.304                                                                                                                         | 1.397                                                                                                                         |
| μ/mm <sup>-1</sup>                          | 0.569                                                                                                                         | 0.685                                                                                                                         |
| F(000)                                      | 968.0                                                                                                                         | 1528                                                                                                                          |
| Crystal size/mm <sup>3</sup>                | 0.46 × 0.32 × 0.08                                                                                                            | 0.48 × 0.16 × 0.04                                                                                                            |
| Radiation                                   | MoKα (λ = 0.71073)                                                                                                            | MoKα (λ = 0.71073)                                                                                                            |
| 2θ range for data collection/°              | 2.354 to 73.384                                                                                                               | 4.53 to 61.324                                                                                                                |
| Reflections collected                       | 88617                                                                                                                         | 93347                                                                                                                         |
| Independent reflections                     | 22948 [R <sub>int</sub> = 0.0355, R <sub>sigma</sub> = 0.0334]                                                                | 28456 [R <sub>int</sub> = 0.1029, R <sub>sigma</sub> = 0.0910]                                                                |
| Data/restraints/parameters                  | 22948/0/508                                                                                                                   | 28456/0/738                                                                                                                   |
| Goodness-of-fit on F <sup>2</sup>           | 0.805                                                                                                                         | 1.031                                                                                                                         |
| Final R indexes [I >= 2σ (I)]               | R <sub>1</sub> = 0.0293, wR <sub>2</sub> = 0.0977                                                                             | R <sub>1</sub> = 0.0642, wR <sub>2</sub> = 0.1528                                                                             |
| Final R indexes [all data]                  | R <sub>1</sub> = 0.0364, wR <sub>2</sub> = 0.1066                                                                             | R <sub>1</sub> = 0.1023, wR <sub>2</sub> = 0.1728                                                                             |
| Largest diff. peak/hole / e Å <sup>-3</sup> | 0.91/-0.52                                                                                                                    | 2.88/-1.95                                                                                                                    |

$$R1 = \frac{\sum ||F_o| - |F_c||}{\sum |F_o|}; wR2 = \left[ \frac{\sum \{w(F_o^2 - F_c^2)^2\}}{\sum w(F_o^2)^2} \right]^{1/2}$$

**Table S4** Crystal structure and refinement data for Rh[P<sub>2</sub>N<sub>2</sub>H](COE) (**6**)

| Rh[P <sub>2</sub> N <sub>2</sub> H](COE) ( <b>6</b> ) |                                                                                 |
|-------------------------------------------------------|---------------------------------------------------------------------------------|
| Chemical formula                                      | C <sub>32</sub> H <sub>57</sub> N <sub>2</sub> P <sub>2</sub> RhSi <sub>4</sub> |
| Formula weight                                        | 747.00                                                                          |
| Temperature/K                                         | 90                                                                              |
| Crystal system                                        | orthorhombic                                                                    |
| Space group                                           | P2 <sub>1</sub> 2 <sub>1</sub> 2 <sub>1</sub>                                   |
| a/Å                                                   | 12.0577(8)                                                                      |
| b/Å                                                   | 16.8079(12)                                                                     |
| c/Å                                                   | 18.6727(14)                                                                     |
| α/°                                                   | 90                                                                              |
| β/°                                                   | 90                                                                              |
| γ/°                                                   | 90                                                                              |
| Volume/Å <sup>3</sup>                                 | 3784.3(5)                                                                       |
| Z                                                     | 4                                                                               |
| ρ <sub>calc</sub> /cm <sup>3</sup>                    | 1.311                                                                           |
| μ/mm <sup>-1</sup>                                    | 0.686                                                                           |
| F(000)                                                | 1576.0                                                                          |
| Crystal size/mm <sup>3</sup>                          | 0.17 × 0.15 × 0.12                                                              |
| Radiation                                             | MoKα (λ = 0.71073)                                                              |
| 2θ range for data collection/°                        | 4.02 to 61.032                                                                  |
| Reflections collected                                 | 11527                                                                           |
| Independent reflections                               | 11527 [R <sub>int</sub> = 0.0686, R <sub>sigma</sub> = 0.0423]                  |
| Data/restraints/parameters                            | 11527/0/379                                                                     |
| Goodness-of-fit on F <sup>2</sup>                     | 1.067                                                                           |
| Final R indexes [I >= 2σ (I)]                         | R <sub>1</sub> = 0.0281, wR <sub>2</sub> = 0.0575                               |
| Final R indexes [all data]                            | R <sub>1</sub> = 0.0329, wR <sub>2</sub> = 0.0590                               |
| Largest diff. peak/hole / e Å <sup>-3</sup>           | 0.42/-0.48                                                                      |

$$R_1 = \frac{\sum ||F_o| - |F_c||}{\sum |F_o|}; wR_2 = \left[ \frac{\sum \{w(F_o^2 - F_c^2)^2\}}{\sum w(F_o^2)^2} \right]^{1/2}$$

## References

1. *SAINT*, Version 8.18C; Bruker AXS Inc.: Madison, Wisconsin, USA, 2012.
2. *SADABS*, Version 2008/1; Bruker AXS Inc.: Madison, Wisconsin, USA, 2008.
3. Dolomanov, O. V.; Bourhis, L. J.; Gildea, R. J.; Howard, J. A. K.; Puschmann, H. *J. Appl. Crystallogr.* **2009**, *42*, 339-341.
4. Sheldrick, G. M. *Acta Cryst. A* **2008**, *64*, 112-122.
5. Farrugia, L. J. *J. Appl. Crystallogr.* **2012**, *45*, 849-854.
